# Supplementary material
Source: bioRxiv or medRxiv preprint supplement (https://medrxiv.org/content/medrxiv/early/2023/09/14/2023.09.07.23295190/DC3/embed/media-3.pdf)

**A**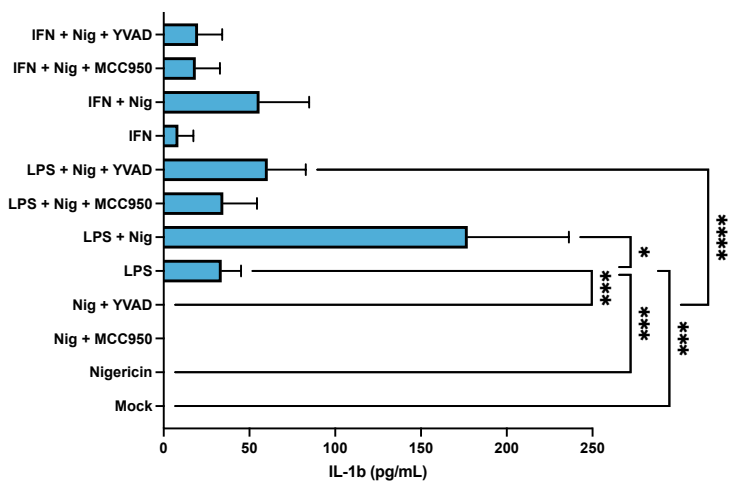**B**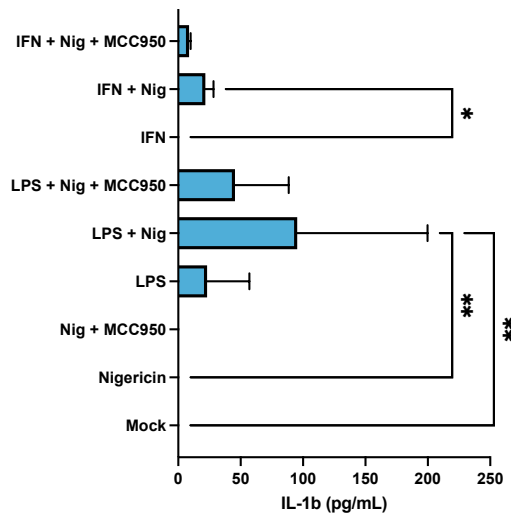**C**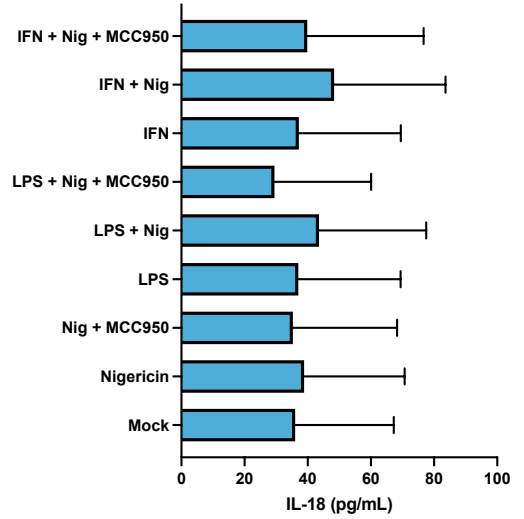**D**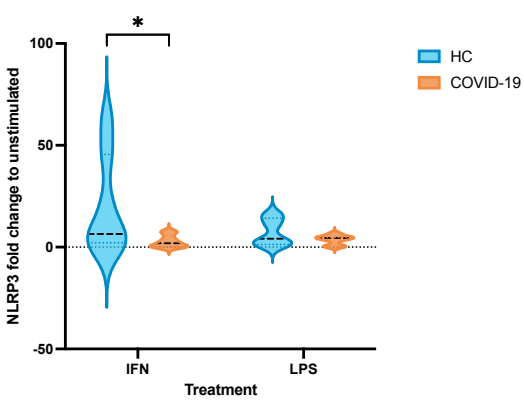**E**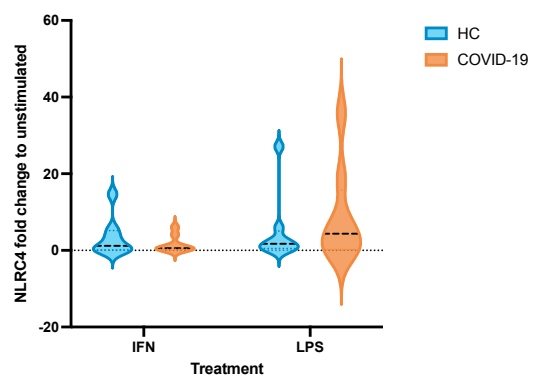**F**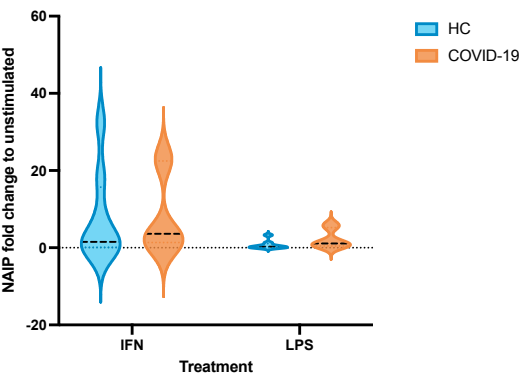**G**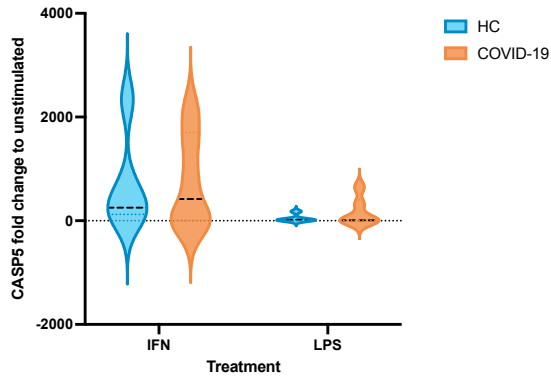

Supplement: Supplementary file [file media-3.pdf]
